# Supplementary material for: A Simple-to-use Tool for Predicting Response to Peginterferon in HBV DNA Suppressed Chronic Hepatitis B Patients
Source: Research Square preprint supplement (doi:10.21203/rs.3.rs-255805/v1), 2021-03-01
Supplement: Supplementary file 1 [file 6afec49f4788e047e49d04aa.docx]

**Supplementary figure legend**

**Supplementary Figure 1.** Patients recruitment. Abbreviations: HBV DNA suppression: HBV DNA < 1000 IU/ mL; HCC: hepatocellular carcinoma; PEG-IFN, peginterferon; viral hepatitis: including hepatitis A, hepatitis C and hepatitis D; AIH: auto-immune hepatitis; HIV: human immunodeficiency virus; without key data for analysis: mainly referring to virology and biochemistry results.
